# Supplementary material for: CATERPILLAR-study protocol: an assessor-blinded randomised controlled trial comparing taurolidine-citrate-heparin to heparin-only lock solutions for the prevention of central line-associated bloodstream infections in paediatric oncology patients
Source: PubMed Central journal article supplement — BMJ Open. 2023 Mar 20;13(3):e069760. doi: 10.1136/bmjopen-2022-069760 (PMC10032404; doi:10.1136/bmjopen-2022-069760), 2023-03-20
Supplement: bmjopen-2022-069760supp001.pdf [file bmjopen-2022-069760supp001.pdf]

**Supplementary File 1** List of shared care centers where data will be collected**Medisch Centrum Leeuwarden**

Henri Dunantweg 2  
8934 AD Leeuwarden  
The Netherlands

**Universitair Medisch Centrum Groningen**

Hanzeplein 1  
9713 GZ Groningen  
The Netherlands

**Isala Zwolle**

Dr. Van Heesweg 2  
8025 AB Zwolle  
The Netherlands

**Deventer Ziekenhuis**

Nico Bolkesteinlaan 75  
7416 SE Deventer  
The Netherlands

**Medisch Spectrum Twente**

Koningplein 1  
7512 KZ Enschede  
The Netherlands

**Ziekenhuis Gelderse Vallei**

Willy Brandtlaan 10  
6716 RP Ede  
The Netherlands

**Flevo ziekenhuis**

Hospitaalweg 1  
1315 RA Almere  
The Netherlands

**Amsterdam UMC**

Meibergdreef 9  
1105 AZ Amsterdam  
The Netherlands

**Dijklander Ziekenhuis**

Maelsonstraat 3  
1624 NP Hoorn  
The Netherlands

**Reinier de Graaf Gasthuis**

Reinier de Graafweg 5  
2625 AD Delft  
The Netherlands

**Erasmus Medisch Centrum**

Dr. Molewaterplein 60  
3015 GJ Rotterdam  
The Netherlands

**Jeroen Bosch Ziekenhuis**

Henri Dunantstraat 1  
5223 GZ 's-Hertogenbosch  
The Netherlands

**Admiraal de Ruyter Ziekenhuis**

's-Gravenpolderseweg 114  
4462 RA Goes  
The Netherlands

**Catharina Ziekenhuis**

Michelangelolaan 2  
5623 EJ Eindhoven  
The Netherlands

**VieCuri**

Tegelseweg 210  
5912 BL Venlo  
The Netherlands
