# Supplementary material for: CATERPILLAR-study protocol: an assessor-blinded randomised controlled trial comparing taurolidine-citrate-heparin to heparin-only lock solutions for the prevention of central line-associated bloodstream infections in paediatric oncology patients
Source: PubMed Central journal article supplement — BMJ Open. 2023 Mar 20;13(3):e069760. doi: 10.1136/bmjopen-2022-069760 (PMC10032404; doi:10.1136/bmjopen-2022-069760), 2023-03-20
Supplement: bmjopen-2022-069760supp003.pdf [file bmjopen-2022-069760supp003.pdf]

**Supplementary File 3** Organisational structure and responsibilities**Principal Investigator and Research Physician**

Design and conduct of the CATERPILLAR-study  
Preparation of protocol and revisions  
Preparation of the case report forms  
Organising steering committee meetings  
Organising data safety monitoring board meetings  
Publication of study reports  
Data verification  
Screens and recruits study subjects  
Obtains Informed Consent  
Confirms eligibility  
Randomisation  
Responsible for trial master file  
Makes study related medical decisions  
Assesses (serious) adverse device events  
Reports (serious) adverse device events

**Steering committee (members described on title page of protocol)**

Agreement of final protocol  
All lead investigators will be steering committee members. Recruitment of patients and liaising with principle investigator  
Reviewing progress of study and if necessary agreeing changes to the protocol to facilitate the smooth running of the study.

**Trial manager**

Study planning  
Organisation of steering committee meetings  
Provide annual ethics committee report  
Advice for lead investigators  
Assistance with international review, board/independent ethics committee applications

**Data Managers**

Entry/correction of data in case report forms in Castor  
Resolves data queries  
Maintains essential documents  
Data verification

**Research Nurses**

Prepares medical device administrations  
Obtains Informed Consent  
Stores medical device
