# Supplementary material for: CATERPILLAR-study protocol: an assessor-blinded randomised controlled trial comparing taurolidine-citrate-heparin to heparin-only lock solutions for the prevention of central line-associated bloodstream infections in paediatric oncology patients
Source: PubMed Central journal article supplement — BMJ Open. 2023 Mar 20;13(3):e069760. doi: 10.1136/bmjopen-2022-069760 (PMC10032404; doi:10.1136/bmjopen-2022-069760), 2023-03-20
Supplement: bmjopen-2022-069760supp004.pdf [file bmjopen-2022-069760supp004.pdf]

NL67388.041.20 / CATERPILLAR studie

## Informatiebrief voor deelname aan medisch wetenschappelijk onderzoek met toestemmingsformulier voor ouders/voogd

### CATERPILLAR-studie

*Officiële titel:* De effectiviteit van een lock oplossing met taurolidine, citraat, en heparine voor de preventie van getunnelde centrale lijn-geassocieerde bloedbaan infecties in kinderoncologie patiënten, een gerandomiseerde, mono-center trial.

### Inleiding

Beste ouders – voogd,

Wij vragen u om uw kind mee te laten doen aan een medisch-wetenschappelijk onderzoek. Meedoen is vrijwillig. Om mee te kunnen doen is wel uw schriftelijke toestemming nodig.

Voordat u beslist of u uw kind mee wilt laten doen aan dit onderzoek, krijgt u uitleg over wat het onderzoek inhoudt. Lees deze informatie rustig door en vraag de arts of onderzoeker om uitleg als u vragen heeft. U kunt ook de onafhankelijk arts, die aan het eind van deze brief genoemd wordt, om aanvullende informatie vragen. U kunt er ook over praten met uw partner, vrienden of familie.

Verdere informatie over meedoen aan onderzoek staat op de online pagina 'Medisch-wetenschappelijk onderzoek'. Deze pagina kunt u vinden via [www.rijksoverheid.nl/mensenonderzoek](http://www.rijksoverheid.nl/mensenonderzoek). Er is ook een folder van de VKN (Vereniging Kinderkanker Nederland) over klinisch onderzoek. Deze folder zit in de dagboekagenda die u aan het begin van de behandeling krijgt.

Heeft u of uw kind na het lezen van de informatie nog vragen? Dan kunt u terecht bij de behandelend arts of de researchverpleegkundige, wiens contactgegevens aan het eind van deze informatiebrief genoemd worden. U en uw kind (boven 12 jaar) beslissen samen of uw kind meedoet of niet.

### 1. Algemene informatie

Dit onderzoek is opgezet door het Prinses Máxima Centrum voor Kinderoncologie en wordt alleen uitgevoerd in Nederland. De KWF Kankerbestrijding vergoedt de kosten van dit onderzoek. Voor dit onderzoek zijn in totaal 462 patiënten nodig. De medisch-ethische toetsingscommissie METC Utrecht heeft dit onderzoek goedgekeurd. Deze commissie heet vanaf 22-1-2022 de medisch-ethische toetsingscommissie NedMec. Algemene informatie over de toetsing van onderzoek vindt u op de online pagina 'Medisch-wetenschappelijk onderzoek'.

### 2. Doel van het onderzoek

Het doel van dit onderzoek is uitzoeken hoe veilig en effectief het nieuwe medische hulpmiddel TauroLock-Hep100 is in het voorkomen van centrale lijn infecties en de vorming van bloedstolsels in de centrale lijn en porta-cath (PAC). In dit onderzoek vergelijken we de werking en veiligheid van TauroLock-Hep100 met de werking en veiligheid van de heparine lock. Een lock is een vloeistof waarmee een centrale lijn of PAC gevuld wordt nadat deze gebruikt is. Dit wordt afsluiten van de centrale lijn of PAC genoemd. Heparine wordt op dit moment in Nederland standaard gebruikt voor het afsluiten van de centrale lijn of PAC.

### 3. Achtergrond van het onderzoek

Voor de behandeling van de ziekte van uw kind moet regelmatig chemotherapie worden toegediend en bloed worden afgenomen. Hiervoor wordt door de chirurg een zogenaamde 'centrale lijn' of 'PAC' geplaatst. Via deze lijn kan tijdens de behandeling eenvoudig en op een veilige manier chemotherapie worden toegediend en bloed worden afgenomen.

## NL67388.041.20 / CATERPILLAR studie

Bij minimaal 1 op de 4 kinderen die een centrale lijn of PAC krijgen, ontstaat tijdens de behandeling een infectie door de centrale lijn of PAC. Gelukkig is zo'n infectie meestal goed te behandelen met het toedienen van antibiotica in het ziekenhuis. Soms moet de centrale lijn of PAC vanwege deze infectie echter vroegtijdig verwijderd worden door middel van een operatie.

Nadat de centrale lijn of PAC gebruikt is voor het toedienen van medicatie of het afnemen van bloed, moet deze worden afgesloten. Dit doen we door de lijn te vullen met een vloeistof. De vloeistof waarmee we de lijn of PAC afsluiten noemen we een 'lock' (zie **afbeelding 1**). Op dit moment wordt de vloeistof 'Heparine' standaard gebruikt als lock. Heparine is een middel dat de vorming van bloedstolsels in de centrale lijn of PAC voorkomt, maar het werkt helaas niet tegen infecties. Daarom zoeken we naar een vloeistof die ook helpt bij het voorkomen van infecties.

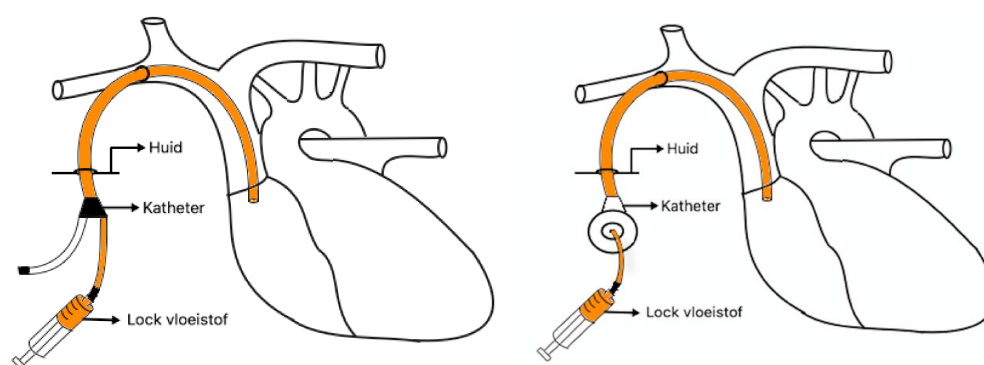

**Afbeelding 1:** Centraal veneuze lijn (links) en PAC (rechts) met lock vloeistof (bijv. Heparine of TauroLock-Hep100)

TauroLock-Hep100 is een andere, nieuwe vloeistof die gebruikt kan worden als lock. TauroLock-Hep 100 voorkomt mogelijk de vorming van bloedstolsels in de centrale lijn of PAC en voorkomt mogelijk ook infecties. Deze vloeistof is al onderzocht bij volwassenen met kanker en bij kinderen met andere aandoeningen én een centrale lijn of PAC. Ook is de TauroLock-Hep100 in kleinere onderzoeken gebruikt bij kinderen met kanker met een centrale lijn of PAC. In deze onderzoeken is TauroLock-Hep100 een veilige en effectieve lock gebleken. In dit onderzoek willen we de TauroLock-Hep100 vergelijken met heparine en aantonen dat deze lock beter is dan de heparine lock. De lock die in dit onderzoek het beste resultaat geeft, kan bij toekomstige patiënten gebruikt worden bij het afsluiten van de centrale lijn of PAC.

#### 4. Wat meedoen inhoudt

Als uw kind meedoet aan het onderzoek, duurt dat in totaal maximaal 90 dagen. Na deze 90 dagen zal de centrale lijn of PAC afgesloten worden met de standaard heparine vloeistof.

#### Geschiktheidsonderzoek

Eerst bepalen we of uw kind kan meedoen aan het onderzoek. De arts zal hiervoor vragen naar de medische geschiedenis van uw kind.

#### Onderzoek

De kinderen die meedoen aan dit onderzoek, worden verdeeld in twee gelijke groepen. De helft van de groep krijgt gedurende 90 dagen de standaard heparine lock, de andere groep krijgt de TauroLock-Hep100 lock. Een loting (randomisatie) bepaalt welke lock uw kind krijgt. De behandelend arts en onderzoekers hebben geen invloed op de uitslag van de loting. Algemene informatie over randomisatie vindt u op de online pagina 'Medisch-wetenschappelijk onderzoek'.

## NL67388.041.20 / CATERPILLAR studie

Tijdens de onderzoeksperiode wordt de lock maximaal 1x per week en minimaal 1x per 3 weken ingebracht in de centrale lijn of PAC. Dat gebeurt in het Prinses Máxima Centrum. Het inbrengen van de lock wordt zoveel als mogelijk gecombineerd met opnames en afspraken die al gepland worden voor de behandeling van uw kind. De lock blijft in het slangetje van de centrale lijn of PAC aanwezig totdat de centrale lijn of PAC weer gebruikt wordt. Als de centrale lijn of PAC opnieuw gebruikt wordt, zal de vloeistof eerst uit de lijn opgetrokken worden. De vloeistof wordt dus zo min mogelijk het lichaam van uw kind ingespoten.

Als de centrale lijn of PAC tussendoor elders of ongepland wordt gebruikt, bijvoorbeeld tijdens een bezoek aan een ander ziekenhuis in Nederland, zal de lock worden opgetrokken zoals hierboven beschreven en zal de lijn of PAC worden afgesloten met een in Nederland gebruikelijke standaard heparine lock. Als de onderzoeksperiode van 90 dagen is afgelopen zal de centrale lijn of PAC van alle patiënten verzorgd worden met de standaard heparine lock.

### Bezoeken en metingen

Er wordt gedurende 90 dagen maximaal 1x per week en minimaal 1x per 3 weken een nieuwe lock ingebracht in het Prinses Máxima Centrum. De lock wordt ingebracht tijdens al geplande afspraken en opnames. Dit zal maximaal 70 minuten in totaal in beslag nemen. Het inbrengen van een TauroLockHep-100 lock verloopt hetzelfde als het inbrengen van een heparine lock. Hoe vaak de lock wordt ingebracht is afhankelijk van hoe vaak de centrale lijn of PAC wordt gebruikt en wanneer u met uw kind in het Prinses Máxima Centrum bent.

Het inbrengen van een lock duurt ongeveer 5 minuten. Na het inbrengen van de lock zullen we uw kind een aantal korte vragen stellen over bijwerkingen. Dit kunnen de bijwerkingen zijn:

- een kortdurende vreemde smaak,
- tintelingen in de mond,
- een drukkend gevoel in nek of borst
- of misselijk gevoel.

We willen graag de bijwerkingen van beide locks goed registreren.

### Wat is er meer of anders dan de gebruikelijke zorg?

Als uw kind meedoet aan het onderzoek, dan krijgt uw kind gedurende 90 dagen mogelijk een TauroLockHep-100 lock in plaats van de gebruikelijke heparine lock.

Bij aanvang van de studie ontvangen u en uw kind een CATERPILLAR-deelnemerskaart en Ja/Nee-stickers (zie **afbeelding 2**). We vragen u de deelnemerskaart en stickers van uw kind bij u te houden en te laten zien bij elk ziekenhuisbezoek in het Prinses Máxima Centrum of een ander ziekenhuis. Zo wordt overal herkend dat uw kind deelneemt aan dit onderzoek.

Het inbrengen van de lock zal altijd gecombineerd worden met al geplande afspraken en opnames van uw kind.

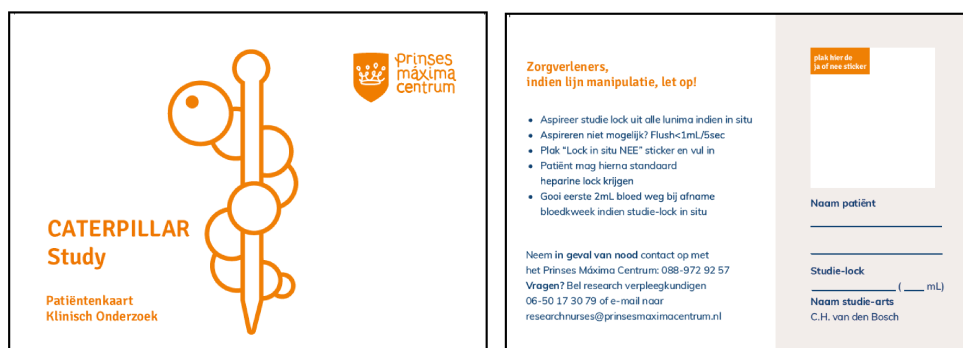

Afbeelding 2: CATERPILLAR-deelnemerskaart.

NL67388.041.20 / CATERPILLAR studie

## 5. Wat wordt er van u en uw kind verwacht

Om het onderzoek goed te laten verlopen, en voor de veiligheid van uw kind, is het belangrijk dat u zich aan de volgende afspraken houdt.

De afspraken dat u en/of uw kind:

- De deelnemerskaart en Ja/Nee-stickers van uw kind bij u draagt en laat zien bij elk ziekenhuisbezoek. Hierop staat dat u meedoet aan dit onderzoek. Er staat ook op wie u in geval van nood moet waarschuwen.
- De afspraken voor het inbrengen van de lock nakomt.
- Vragen beantwoordt over het ontstaan van eventuele symptomen na het inbrengen van de lock.

Het is belangrijk dat u contact opneemt met de onderzoeker of research verpleegkundige:

- Als uw kind in een ziekenhuis wordt opgenomen of behandeld.
- Als uw kind plotseling gezondheidsklachten krijgt.
- Als uw kind niet meer wilt meedoen aan het onderzoek.
- Als uw contactgegevens wijzigen.

## Anticonceptie en zwangerschap

Is uw dochter in de vruchtbare leeftijd? Dan moet ze voorkomen dat ze tijdens het onderzoek zwanger wordt en mag zij ook niet deelnemen indien zij borstvoeding geeft. De behandelend arts zal met u en uw dochter de meest geschikte voorbehoedmiddelen bespreken. Wordt uw dochter toch zwanger in de onderzoeksperiode? Neem direct contact op met de behandelend arts. Het kan zijn dat dit onderzoek gevolgen heeft voor het ongeboren kind.

Is uw zoon in de leeftijd waarop de mogelijkheid bestaat om een kind te verwekken? Dan dient uw zoon voorbehoedmiddelen te gebruiken om zwangerschap te voorkomen. Men weet namelijk niet zeker of het geneesmiddel nadelige invloed heeft op het sperma. Wordt de partner van uw zoon toch zwanger in de onderzoeksperiode? Neem direct contact op met de behandelend arts. Het kan zijn dat dit onderzoek gevolgen heeft voor het ongeboren kind.

## 6. Mogelijke bijwerkingen, complicaties en eventuele nadelige effecten

TauroLock-Hep100 kan mogelijk lichte ongemakken geven. Deze ongemakken komen niet vaak voor en zijn niet ernstig gebleken. Uw kind kan de volgende lichte ongemakken ervaren direct na het inbrengen van de TauroLock-Hep100:

- Kortdurende veranderde smaak
- Kortdurende tintelingen in de mond
- Kortdurend drukkend gevoel in de nek of borst
- Kortdurende misselijkheid of overgeven
- Allergische reacties op het middel

TauroLock-Hep100 kan ook nadelige effecten hebben die nog onbekend zijn.

De standaard heparine lock wordt al heel veel gebruikt. Hiervan zijn geen bijwerkingen bekend.

## 7. Mogelijke voor- en nadelen

Het is belangrijk dat u de mogelijke voor- en nadelen goed afweegt voordat u besluit dat uw kind mee mag doen aan het onderzoek.

Voordelen:

- Als uw kind meedoet aan dit onderzoek en na de loting de TauroLock-Hep 100 lock krijgt, dan kan de TauroLock-Hep100 tijdens de onderzoeksperiode centrale lijn infecties mogelijk voorkomen. Dit is echter nog niet aangetoond en de reden dat we dit onderzoek uitvoeren.

## NL67388.041.20 / CATERPILLAR studie

- De deelname van uw kind aan dit onderzoek draagt bij aan meer kennis over het voorkomen van centrale lijn infecties en kan de behandeling van toekomstige patiënten verbeteren.

## Nadelen:

- Als uw kind na de loting de TauroLock-Hep100 lock krijgt, dan kan uw kind de al genoemde bijwerkingen ervaren bij het inbrengen van de locks.

**8. Verzet van uw kind**

Het kan zijn dat uw kind zich tijdens het onderzoek verzet (niet meewerkt). De onderzoeker moet het onderzoek dan direct stoppen. Het is moeilijk om precies te omschrijven wat verzet is. Voor de start van het onderzoek wordt met u overlegd wat als verzet wordt gezien.

Er is in het Prinses Máxima Centrum een team van gespecialiseerde medewerkers (zoals een arts, psycholoog, gespecialiseerde verpleegkundige) beschikbaar om u en uw kind tijdens het onderzoek zo goed mogelijk te begeleiden. Het behandelteam ziet nauwlettend toe op de belasting die deelname aan een onderzoeksprotocol voor uw kind met zich meebrengt. We werken daarom ook zoveel mogelijk volgens landelijke afspraken zoals die door de Nederlandse Vereniging voor Kindergeneeskunde (NVK) zijn vastgelegd ter bescherming van minderjarige onderzoeksdeelnemers. Voor meer informatie hierover verwijzen we u naar de website [www.ccmo.nl](http://www.ccmo.nl) onder 'wet en regelgeving', 'Gedragscodes', 'gedragscodes bij verzet'.

**9. Als u niet wilt dat uw kind meedoet of als u wilt dat uw kind stopt met het onderzoek**

U beslist zelf of uw kind meedoet aan het onderzoek. Deelname is vrijwillig. Als u niet wilt dat uw kind meedoet, wordt uw kind op de gebruikelijke manier behandeld. De standaard behandeling is de heparine lock.

Als uw kind meedoet, kunt u zich altijd bedenken en uw kind alsnog laten stoppen, ook tijdens het onderzoek. De centrale lijn of PAC zal vanaf dat moment afgesloten worden met de standaard heparine lock. U hoeft niet te zeggen waarom u stopt. Wel moet u dit direct melden aan de behandelend arts. De gegevens die tot dat moment zijn verzameld, worden gebruikt voor het onderzoek.

Als er nieuwe informatie over het onderzoek is die belangrijk voor u en uw kind is, laat de arts dit aan u weten. U wordt dan gevraagd of uw kind mee blijft doen.

**10. Einde van het onderzoek**

Deelname van uw kind aan het onderzoek stopt als:

- De onderzoeksperiode van 90 dagen voorbij is.
- Uw kind een infectie aan de centrale lijn of PAC krijgt.
- De centrale lijn of PAC om een medische reden wordt verwijderd.
- Je een extra centrale lijn krijgt.
- Uw kind een allergische reactie krijgt op het middel.
- Uw kind zelf kiest om te stoppen.
- De onderzoeker het beter voor uw kind vindt om te stoppen.
- Het Prinses Máxima Centrum, de overheid of de beoordelende medisch-ethische toetsingscommissie, besluit om het onderzoek te stoppen.

Het hele onderzoek is afgelopen als alle deelnemers klaar zijn. Na het verwerken van alle gegevens kan de onderzoeker u als u dat wilt informeren over de belangrijkste uitkomsten van het onderzoek. Dit gebeurt ongeveer een half jaar na het einde van het gehele onderzoek.

**11. Gebruik en bewaren van de gegevens**

Voor dit onderzoek worden de persoonsgegevens van uw kind verzameld, gebruikt en bewaard. Het gaat om gegevens zoals naam, adres, geboortedatum en om gegevens over de gezondheid van uw kind. Het verzamelen,

## NL67388.041.20 / CATERPILLAR studie

gebruiken en bewaren van de gegevens van uw kind is nodig om de vragen die in dit onderzoek worden gesteld te kunnen beantwoorden en de resultaten te kunnen publiceren. Wij vragen voor het gebruik van de gegevens van uw kind uw toestemming. Als u dat niet wilt, kan uw kind niet deelnemen aan dit onderzoek.

**Vertrouwelijkheid van de gegevens van uw kind**

Om de privacy van uw kind te beschermen, worden de gegevens van uw kind voorzien van een code. De naam en andere gegevens die uw kind direct kunnen identificeren worden apart bewaard. Alleen met de sleutel van de code zijn gegevens tot uw kind te herleiden. De sleutel van de code blijft veilig opgeborgen in de lokale onderzoeksinstelling. Ook in rapporten en publicaties over het onderzoek zijn de gegevens niet tot uw kind te herleiden.

**Toegang tot de gegevens van uw kind voor controle**

Sommige personen en instanties kunnen op de onderzoekslocatie toegang krijgen tot al de gegevens van uw kind. Ook in de gegevens zonder code. Dit is nodig om te kunnen controleren of het onderzoek goed en betrouwbaar is uitgevoerd. Personen en instanties die ter controle toegang krijgen tot de gegevens van uw kind zijn de:

- Veiligheidscommissie die het onderzoek in de gaten houdt.
- Een monitor die door de opdrachtgever is ingehuurd.
- Nationale en internationale toezichthoudende autoriteiten, bijv. de Inspectie Gezondheidszorg en Jeugd.
- De medewerkers van het onderzoeksteam.

Zij zullen de gegevens van uw kind geheim houden. U wordt gevraagd voor deze inzage toestemming te geven.

**Bewaartermijn gegevens van uw kind**

De gegevens van uw kind moeten 15 jaar worden bewaard op de onderzoekslocatie (het ziekenhuis).

**Bewaren en gebruik van gegevens van uw kind voor ander onderzoek**

De gegevens van uw kind kunnen na afloop van dit onderzoek ook nog van belang zijn voor ander wetenschappelijk onderzoek op het gebied van de aandoening van uw kind en/of van de verdere ontwikkeling van het product/ de behandelmethode. Daarvoor zullen de gegevens van uw kind minimaal 15 jaar worden bewaard. U kunt op het toestemmingsformulier aangeven of u hier wel of niet mee instemt. Indien u hier niet mee instemt, kan uw kind gewoon deelnemen aan het huidige onderzoek.

**Intrekken toestemming**

U kunt de toestemming voor gebruik van de persoonsgegevens van uw kind altijd weer intrekken. Dit geldt voor dit onderzoek en ook voor het bewaren en het gebruik van gegevens voor het toekomstig onderzoek. De onderzoeksgegevens over uw kind die zijn verzameld tot het moment dat u de toestemming intrekt worden nog wel gebruikt in het onderzoek.

**Meer informatie over de rechten bij verwerking van gegevens van uw kind**

Voor algemene informatie over uw rechten bij verwerking van de persoonsgegevens van uw kind kunt u de website van de Autoriteit Persoonsgegevens raadplegen op: <https://autoriteitpersoonsgegevens.nl/nl>

Bij vragen of klachten over de verwerking van de persoonsgegevens van uw kind kunt u contact opnemen met de Functionaris voor de Gegevensbescherming van het Prinses Máxima Centrum: [fg@prinsesmaximacentrum.nl](mailto:fg@prinsesmaximacentrum.nl)

**Registratie van het onderzoek**

Informatie over dit onderzoek is ook opgenomen in een overzicht van medisch-wetenschappelijke onderzoeken namelijk <https://www.trialregister.nl>. Daarin zijn geen gegevens opgenomen die naar uw kind herleidbaar zijn. Na het onderzoek kan de website een samenvatting van de resultaten van dit onderzoek tonen. U vindt dit onderzoek onder 'CATERPILLAR'.

NL67388.041.20 / CATERPILLAR studie

## 12. Verzekering

Voor iedereen die meedoet aan dit onderzoek is een verzekering afgesloten. De verzekering dekt schade door het onderzoek. Niet alle schade is gedekt. In **bijlage A** vindt u meer informatie over de verzekering en de uitzonderingen. Daar staat ook aan wie u schade kunt melden.

## 13. Informeren van de huisarts en/of behandelend specialist

Wij informeren de huisarts en andere betrokken medisch specialisten over de deelname van uw kind aan het onderzoek. Dit is voor de veiligheid van uw kind. Als u dit niet goed vindt, kan uw kind niet meedoen aan dit onderzoek.

## 14. Vergoeding voor meedoen

Deelname van uw kind aan het onderzoek, de locks kosten u niets extra. U krijgt geen vergoeding voor de deelname van uw kind aan het onderzoek.

## 15. Heeft u vragen?

Als u tijdens het onderzoek of de behandeling vragen of klachten heeft, kunt u altijd terecht bij de behandelend arts van uw kind. Bij vragen of opmerkingen kunt u ook contact opnemen met:

- Drs. Ceder van den Bosch, arts-onderzoeker, bereikbaar via het telefoonnummer: 0650006564
- De researchverpleegkundigen, bereikbaar via het telefoonnummer: 0650173079

Of stuur een e-mail naar: [researchnurses@prinsesmaximacentrum.nl](mailto:researchnurses@prinsesmaximacentrum.nl)

Als u twijfelt over deelname van uw kind aan het onderzoek, dan kunt u een onafhankelijke arts raadplegen die zelf niet bij het onderzoek is betrokken maar wel deskundig is op dit gebied.

- Dr. Bierings is bereikbaar via het telefoonnummer: 088 9725249

Ook als u voor of tijdens het onderzoek vragen heeft die u liever niet aan de onderzoekers stelt dan kunt u contact opnemen met de onafhankelijke arts.

Als u of uw kind een klacht wil indienen, dan kunt u hiervoor contact opnemen met de ombudsvrouw van het Prinses Máxima Centrum. Zij probeert samen met u, uw kind en de betrokkenen tot een oplossing te komen. De ombudsvrouw is dagelijks bereikbaar op het telefoonnummer 0650006416 of via de mail:

[ombudsvrouw@prinsesmaximacentrum.nl](mailto:ombudsvrouw@prinsesmaximacentrum.nl).

## 16. Ondertekening toestemmingsformulier

Wanneer u voldoende bedenktijd heeft gehad, wordt u gevraagd te beslissen over deelname aan dit onderzoek.

Als u toestemming geeft, zullen wij u vragen deze op de bijbehorende toestemmingsverklaring schriftelijk te bevestigen. Door uw schriftelijke toestemming geeft u aan dat u de informatie heeft begrepen en instemt met deelname van uw kind aan het onderzoek. Het getekende formulier wordt bewaard door de behandelend arts. U ontvangt een kopie van de getekende toestemmingsverklaring.

Met vriendelijke groet,

Prof. Dr. Marc Wijnen, kinderoncologisch chirurg

Drs. Ceder van den Bosch, arts-onderzoeker

NL67388.041.20 / CATERPILLAR studie

**Bijlagen:**

Bijlage A: Informatie over verzekering

- Online pagina Medisch-wetenschappelijk onderzoek: <https://www.rijksoverheid.nl/mensenonderzoek>
- Toestemmingsformulier

NL67388.041.20 / CATERPILLAR studie

**Bijlage A: Informatie over de verzekering**

Voor iedereen die meedoet aan dit onderzoek heeft het Prinses Máxima Centrum voor Kinderoncologie een verzekering afgesloten. De verzekering dekt schade door deelname aan het onderzoek. Dit geldt voor schade tijdens het onderzoek of binnen vier jaar na het einde van deelname van uw kind aan het onderzoek. Schade moet u binnen die vier jaar aan de verzekeraar hebben gemeld.

De verzekering dekt niet alle schade. Onderaan deze tekst staat in het kort welke schade niet wordt gedekt. Deze bepalingen staan in het Besluit verplichte verzekering bij medisch-wetenschappelijk onderzoek met mensen. Dit besluit staat op [www.ccmo.nl](http://www.ccmo.nl), de website van de Centrale Commissie Mensgebonden Onderzoek (zie 'Bibliotheek' en dan 'Wet- en regelgeving').

Bij schade kunt u direct contact leggen met de verzekeraar of schaderegelaar.

De verzekeraar van het onderzoek is:

Naam: CNA Insurance Company Limited.  
Adres: Polarisavenue 140, 2132 JX Hoofddorp  
(Polisnummer: 10211864)

De schaderegelaar van het onderzoek is:

Naam: Esther van Herk  
Adres: Polarisavenue 140, 2132 JX Hoofddorp  
E-mail: [esther.vanherk@cnahardy.com](mailto:esther.vanherk@cnahardy.com)  
Telefoonnummer: +31 (0)23 3036004

De verzekering biedt een maximum dekking van € 650.000 per proefpersoon en € 5.000.000 voor het hele onderzoek en € 7.500.000 per jaar voor alle onderzoeken van dezelfde opdrachtgever.

De verzekering dekt de volgende schade **niet**:

- Schade door een risico waarover u in de schriftelijke informatie bent ingelicht. Dit geldt niet als het risico zich ernstiger voordoet dan was voorzien of als het risico heel onwaarschijnlijk was;
- Schade aan uw gezondheid die ook zou zijn ontstaan als u niet aan het onderzoek had meegedaan;
- Schade door het niet (volledig) opvolgen van aanwijzingen of instructies;
- Schade aan uw nakomelingen, als gevolg van een negatief effect van het onderzoek op u of uw nakomelingen;
- Schade door een bestaande behandelmethode bij onderzoek naar bestaande behandelmethoden.

NL67388.041.20 / CATERPILLAR studie

NL67388.041.20 / CATERPILLAR studie

**Toestemmingsformulier voor ouders of voogd**

**Officiële titel:** De effectiviteit van een lock oplossing met taurolidine, citraat, en heparine voor de preventie van getunnelde centrale lijn-geassocieerde bloedbaan infecties in kinderoncologie patiënten, een gerandomiseerde, mono-center trial.

Ik ben gevraagd om toestemming te geven, voor deelname van mijn kind aan dit medisch-wetenschappelijke onderzoek:

Naam kind: \_\_\_\_\_ Geboortedatum \_\_\_\_/\_\_\_\_/\_\_\_\_

- Ik heb de informatiebrief gelezen. Ik kon aanvullende vragen stellen. Mijn vragen zijn genoeg beantwoord. Ik had genoeg tijd om te beslissen of ik wil dat mijn kind meedoet.
- Ik weet dat meedoen vrijwillig is. Ook weet ik dat ik op ieder moment kan beslissen dat mijn kind toch niet meedoet. Daarvoor hoef ik geen reden te geven.
- Ik geef toestemming voor het informeren van de huisarts en specialist die mijn kind behandelt dat mijn kind meedoet aan dit onderzoek.
- Ik geef toestemming voor het opvragen van informatie bij de huisarts en specialist die mijn kind behandelt over de centrale lijn en eventuele centrale lijn complicaties.
- Ik geef toestemming voor het verzamelen en gebruiken van de gegevens van mijn kind voor de beantwoording van de onderzoeksvraag in dit onderzoek.
- Ik weet dat voor de controle van het onderzoek sommige mensen toegang tot alle gegevens van mijn kind kunnen krijgen. Die mensen staan vermeld in deze informatiebrief. Ik geef toestemming voor die inzage door deze personen.
- Ik weet dat mijn kind niet zwanger mag worden/de partner niet zwanger mag maken tijdens het onderzoek. De onderzoeker heeft de meest geschikte anticonceptie voor mijn kind en/of partner met mij besproken.
- Ik geef ☐ wel ☐ geen \* toestemming om de persoonsgegevens van mijn kind langer te bewaren en te gebruiken voor toekomstig onderzoek op het gebied van centrale lijn infecties.
- Ik geef ☐ wel ☐ geen \* toestemming om mijn kind na dit onderzoek opnieuw te benaderen voor een vervolgonderzoek.
- Na het ondertekenen van dit toestemmingsformulier zal ik een kopie van de ondertekenpagina ontvangen.
- Ik geef toestemming voor de randomisatie (loting) in dit onderzoek.

Ik ga ermee akkoord dat mijn kind meedoet aan dit onderzoek.

Naam ouder/voogd\*\* : \_\_\_\_\_

Handtekening: \_\_\_\_\_

Datum: \_\_\_\_/\_\_\_\_/\_\_\_\_

Naam ouder/voogd\*\* : \_\_\_\_\_

Handtekening: \_\_\_\_\_

Datum: \_\_\_\_/\_\_\_\_/\_\_\_\_

\* Doorhalen wat niet van toepassing is.

\*\* Wanneer het kind jonger dan 16 jaar is, ondertekenen de ouders die het gezag uitoefenen of de voogd dit formulier. Kinderen van 12 t/m 15 jaar die zelfstandig beslissingen kunnen nemen (wilsbekwaam zijn), moeten ook het Toestemmingsformulier voor kinderen en jongeren ondertekenen.

De ouder/voogd krijgt een volledige informatiebrief mee, samen met een getekende versie van het toestemmingsformulier.

Informatie en toestemmingsformulier ouders-verzorgers, CATERPILLAR studie  
Prinses Máxima Centrum, versie 2.1, 08-03-2022

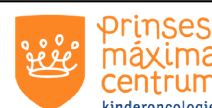

NL67388.041.20 / CATERPILLAR studie

**Toestemmingsformulier voor ouders of voogd**

---

**Officiële titel:** De effectiviteit van een lock oplossing met taurolidine, citraat, en heparine voor de preventie van getunnelde centrale lijn-geassocieerde bloedbaan infecties in kinderoncologie patiënten, een gerandomiseerde, mono-center trial.

Ik verklaar hierbij dat ik bovengenoemde persoon/personen volledig heb geïnformeerd over het genoemde onderzoek. Als er tijdens het onderzoek informatie bekend wordt die de toestemming van de ouder of voogd zou kunnen beïnvloeden, dan breng ik hem/haar daarvan tijdig op de hoogte.

Naam arts: .....

Handtekening: .....

Datum: \_\_\_\_/\_\_\_\_/\_\_\_\_

---

Aanvullende informatie is gegeven door (indien van toepassing):

Naam: .....

Functie: .....

Handtekening: .....

Datum: \_\_\_\_/\_\_\_\_/\_\_\_\_  

---

NL67388.041.20 / CATERPILLAR studie

## Informatiebrief voor deelname aan medisch wetenschappelijk onderzoek met toestemmingsformulier voor kinderen van 12 tot 16 jaar

### CATERPILLAR-studie

*Officiële titel:* De effectiviteit van een lock oplossing met taurolidine, citraat, en heparine voor de preventie van getunnelde centrale lijn-geassocieerde bloedbaan infecties in kinderoncologie patiënten, een gerandomiseerde, mono-center trial.

Beste .....,

Doe je mee aan een onderzoek? Hier lees je meer over het onderzoek en jouw rechten. Lees dit goed, want dan weet je waarover je kunt beslissen. Je mag rustig nadenken voordat je beslist.

Je ouders krijgen ook informatie over dit onderzoek. Je kunt samen met hen praten over het onderzoek. Zij zullen samen met jou een beslissing nemen.

Meer informatie over meedoen aan een onderzoek kun je online vinden op de pagina 'Medisch-wetenschappelijk onderzoek' via [www.rijksoverheid.nl/mensenonderzoek](http://www.rijksoverheid.nl/mensenonderzoek). Er is ook een folder van de VKN (Vereniging Kinderkanker Nederland) over klinisch onderzoek.

### Vragen en contact

Heb je vragen? Bespreek ze met je ouders of stel ze aan je dokter, de onderzoeker of de onderzoeksverpleegkundige. Je kunt je vragen hieronder opschrijven.

Je mag de onderzoeker of de onderzoeksverpleegkundige ook altijd bellen of mailen:

- Drs. Ceder van den Bosch bereikbaar via het telefoonnummer 0650006564 of stuur een mail naar [C.H.vandenBosch-4@prinsesmaximacentrum.nl](mailto:C.H.vandenBosch-4@prinsesmaximacentrum.nl)
- De onderzoeksverpleegkundige, bereikbaar via het telefoonnummer 0650173079 of stuur een e-mail naar [researchnurses@prinsesmaximacentrum.nl](mailto:researchnurses@prinsesmaximacentrum.nl).

Wil je praten over het onderzoek met een arts die er niet bij betrokken is? Bel dan met:

- Dr. Bierings, bereikbaar via het telefoonnummer 088 9725249.

#### Ruimte op jouw vragen op te schrijven:

**Tip:** neem een foto van je vragen, dan heb je ze bij je als je met de arts/on onderzoeker gaat praten.

NL67388.041.20 / CATERPILLAR studie

## Over het onderzoek

Dit onderzoek gebeurt in het Prinses Máxima Centrum voor Kinderoncologie. Er doen in totaal 462 kinderen en jongeren mee. Het onderzoek is gecontroleerd en goedgekeurd. De naam van de commissie die de beoordeling heeft gedaan is: METC Utrecht. Nu heet deze commissie METC NedMec.

## Waarom dit onderzoek?

Je ontvangt deze brief omdat bij jou een vorm van kinderkanker is vastgesteld en je voor de behandeling een centrale lijn of port-a-cath (PAC) krijgt (zie **afbeelding 1**).

We willen uitzoeken hoe veilig TauroLock-Hep100 is en hoe goed het werkt tegen het ontstaan van ontstekingen van en samenklontering van bloed in de centrale lijn of PAC. We vergelijken TauroLock met het middel dat we normaal gebruiken om je centrale lijn of PAC mee af te sluiten: Heparine. Zo kunnen we kijken welk middel beter werkt en het meest veilig is. Er zijn twee groepen in het onderzoek, de ene groep krijgt de eerste 90 dagen de standaard heparine lock, de andere groep krijgt de TauroLock.

## Achtergrond

Voor de behandeling van je ziekte moeten we regelmatig chemotherapie geven en bloed afnemen. Hiervoor wordt door de chirurg een zogenaamde 'centrale lijn' of 'PAC' geplaatst (zie **afbeelding 1**). Via deze lijn kan tijdens de behandeling eenvoudig en op een veilige manier chemotherapie worden toegediend of bloed worden afgenomen.

Bij een kwart van de kinderen en jongeren die een centrale lijn of PAC krijgen ontstaat tijdens de behandeling een ontsteking door de centrale lijn of PAC. We noemen dit een infectie. Gelukkig is zo'n infectie meestal goed te behandelen met het toedienen van medicijnen in het ziekenhuis. Soms moet de centrale lijn of PAC vanwege een infectie door de chirurg verwijderd worden met een operatie.

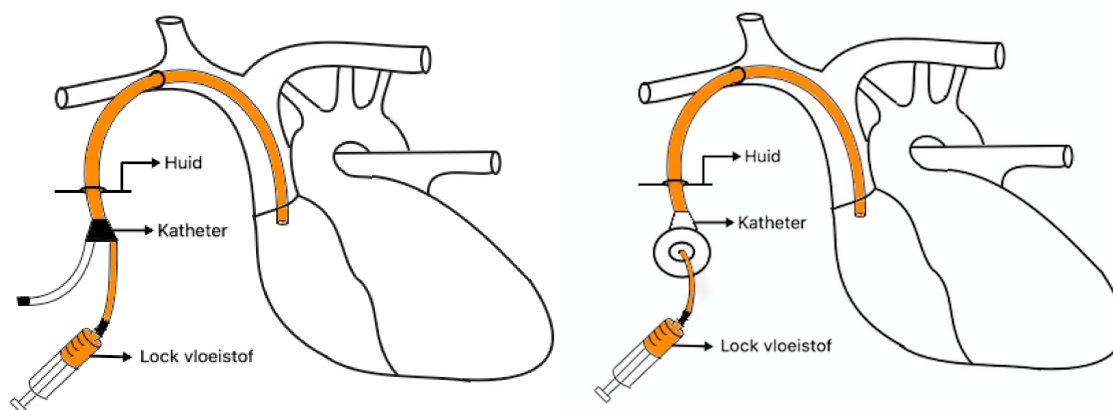

**Afbeelding 1:** We spuiten een heparine lock of TauroLock (oranje) in je centrale lijn (links) of PAC (rechts).

Nadat de centrale lijn of PAC gebruikt is voor het toedienen van medicijnen of het afnemen van bloed moet deze worden afgesloten door de lijn te vullen met een vloeistof. De vloeistof waarmee we de lijn afsluiten noemen we een 'lock' (zie **afbeelding 1**). Op dit moment wordt de vloeistof 'Heparine' standaard gebruikt als lock. Heparine is een middel dat de vorming van bloedstolsels (een samenklontering van

Informatie en toestemmingsformulier, kind 12-16 jaar, CATERPILLAR studie  
Prinses Máxima Centrum, versie 2.1, 08-03-2022

## NL67388.041.20 / CATERPILLAR studie

bloedrestjes) in de centrale lijn voorkomt. Maar heparine werkt niet goed tegen infecties. Daarom zoeken we naar een vloeistof die ook helpt bij het voorkomen van infecties.

TauroLock is een andere, nieuwe vloeistof die gebruikt kan worden als lock. TauroLock kan mogelijk de vorming van bloedstolsels in de centrale lijn en ook infecties voorkomen. In dit onderzoek willen we de TauroLock vergelijken met heparine en aantonen dat deze lock beter werkt tegen infecties dan heparine. De lock die in dit onderzoek het beste werkt kan bij toekomstige patiënten gebruikt worden voor het afsluiten van de centrale lijn en PAC.

**Hoe werkt meedoen?**

Het onderzoek duurt in totaal maximaal 90 dagen en zal jou maximaal 70 minuten kosten in totaal. We gaan eerst kijken of je mee kunt doen. Dit duurt ongeveer 5 minuten. We vragen dan naar jouw gezondheid.

Er zijn twee groepen in de studie. De ene groep krijgt de eerste 90 dagen de standaard heparine lock, de andere groep krijgt de TauroLock. We loten van tevoren in welke groep jij zit. Je kunt dit dus niet zelf kiezen. Daarna vertellen we je in welke groep je zit. Wil je meer weten waarom we loten? Dan kun je dit vragen aan de arts of onderzoeksverpleegkundige.

De lock brengen we zo veel mogelijk in tijdens een al geplande afspraak in het Prinses Máxima Centrum. De lock wordt maximaal 1x per week en minimaal 1x per 3 weken ingebracht. Hoe vaak de lock wordt ingebracht is afhankelijk van hoe vaak je centrale lijn of PAC wordt gebruikt en wanneer je in het Prinses Máxima Centrum bent.

- Het inbrengen van de lock duurt ongeveer 5 minuten en doet geen pijn (zie **afbeelding 1 en 2**).
- Daarna vragen we je of je bijwerkingen hebt gevoeld tijdens of vlak na het inbrengen van de lock.
- De lock blijft in het slangetje van je centrale lijn of PAC aanwezig totdat de centrale lijn of PAC weer gebruikt wordt. Als de centrale lijn of PAC opnieuw gebruikt wordt, zal de vloeistof eerst uit de lijn gehaald worden.
- Als je centrale lijn of PAC tussendoor onverwacht of tijdens een bezoek aan een ander ziekenhuis in Nederland wordt gebruikt dan, zal de lijn worden afgesloten met de in Nederland gebruikelijke heparine lock.

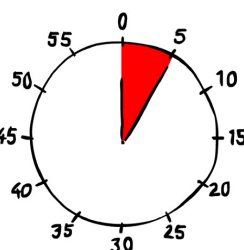

**Afbeelding 2:** Het inbrengen van de lock duurt ongeveer 5 minuten.

Aan het begin van het onderzoek krijg je een CATERPILLAR-deelnemerskaart (zie **afbeelding 4**). We vragen jou en je ouders om de deelnemerskaart bij jullie te houden en te laten zien bij elk ziekenhuisbezoek in het Prinses Máxima Centrum of een ander ziekenhuis. Zo ziet iedereen die je centrale lijn of PAC verzorgd dat je meedoet aan dit onderzoek.

Informatie en toestemmingsformulier, kind 12-16 jaar, CATERPILLAR studie  
Prinses Máxima Centrum, versie 2.1, 08-03-2022

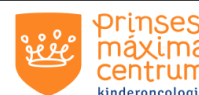

NL67388.041.20 / CATERPILLAR studie

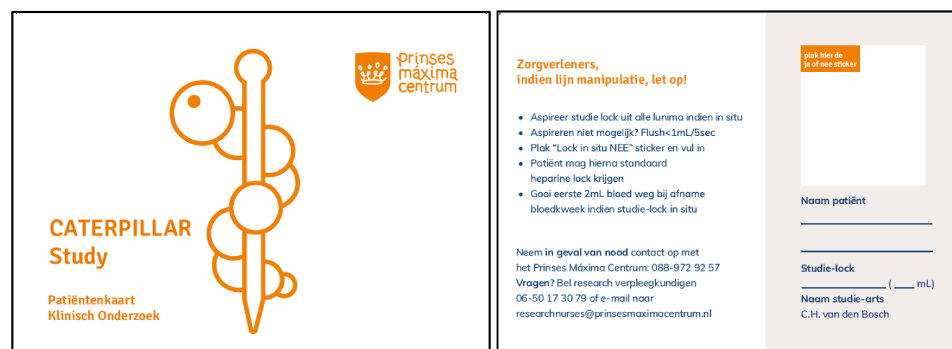

The image shows a participant card for the CATERPILLAR Study. It is divided into three main sections. The left section features the study logo (a caterpillar) and the text 'CATERPILLAR Study' and 'Patiëntenkaart Klinisch Onderzoek'. The middle section, titled 'Zorgverleners, indien lijn manipulatie, let op!', lists instructions for healthcare providers regarding the study lock, such as aspirating the lock, flushing, and heparine lock. It also provides contact information for Prinses Máxima Centrum. The right section, titled 'plak hier de 1e of 2e studie', contains fields for 'Naam patiënt', 'Studie-lock' (with a volume measurement), and 'Naam studie-arts' (C.H. van den Bosch).

Afbeelding 4: CATERPILLAR- deelnemerskaart.

Na de onderzoeksperiode van 90 dagen is het onderzoek afgelopen. We zullen je centrale lijn of PAC daarna verzorgen met de gebruikelijke heparine.

### Over het onderzoeksmiddel

Als je meedoet aan dit onderzoek krijg je de standaard heparine lock of de Taurolock. Heparine werkt tegen de samenklontering van bloed in de centrale lijn of PAC. TauroLock voorkomt de samenklontering van bloed in de centrale lijn of PAC en voorkomt mogelijk ook infecties van de centrale lijn. Taurolock is een al eerder goedgekeurde en geregistreerde vloeistof.

### Bijwerkingen

Tijdens het inspuiten van TauroLock kun je misschien last krijgen van een gekke smaak of tintelingen in je mond, misselijkheid of een drukkend gevoel in je nek of borst. Dit komt niet zo vaak voor en gaat binnen enkele minuten weer over. Voel je je vlak na het inbrengen van de lock niet goed? Vertel het meteen aan je ouders zodat zij de dokter of verpleegkundige kunnen bellen.

### Risico's

We doen dit onderzoek omdat we nog niet alles weten over TauroLock. De behandeling kan dus ook bijwerkingen hebben die we nu nog niet weten. Daar letten we tijdens het onderzoek goed op.

### Ongemakken

Het inbrengen van de lock zal altijd gecombineerd worden met andere afspraken en opnames in het ziekenhuis. Je hoeft dus niet speciaal voor het onderzoek naar het ziekenhuis te komen.

### Anders dan normaal

- Als je meedoet aan het onderzoek, dan krijg je na de loting mogelijk een TauroLock in plaats van de gebruikelijke heparine lock.

### Belangrijk om te weten:

- Je krijgt een kaartje met telefoonnummers en informatie over het onderzoek. Dit kaartje moet je altijd bij je hebben.
- Ben je zwanger of is je partner zwanger? Vertel het aan de onderzoeker. Die bespreekt dan met jou wat dit betekent voor het meedoen aan het onderzoek.

Informatie en toestemmingsformulier, kind 12-16 jaar, CATERPILLAR studie  
Prinses Máxima Centrum, versie 2.1, 08-03-2022

NL67388.041.20 / CATERPILLAR studie

**Voordelen en nadelen:**

Het is belangrijk dat je nadenkt over de mogelijke voor- en nadelen voordat je besluit om mee te doen:

- Als je meedoet aan dit onderzoek en na de loting de TauroLock-Hep 100 lock krijgt, dan kan de TauroLock-Hep100 centrale lijn infecties mogelijk voorkomen. Dit is nog niet aangetoond en de reden dat we dit onderzoek uitvoeren.
- Jouw deelname aan dit onderzoek draagt bij aan meer kennis over het voorkomen van centrale lijn infecties en kan de behandeling van toekomstige patiënten verbeteren.
- Als je na de loting de TauroLock-Hep100 lock krijgt, dan kan je de al genoemde bijwerkingen ervaren bij het inbrengen van de locks.
- Het plaatsen van de locks wordt altijd gedaan tijdens de al geplande afspraken en opnames.
- Als je niet meedoet aan het onderzoek heb je geen nadelen. Dan krijg je de behandeling die je normaal ook zou krijgen.

**Vergoeding**

Er zijn voor jou geen extra kosten verbonden aan deelname aan dit onderzoek.

**Jouw rechten****Moet je meedoen?**

Nee, je mag **zelf weten** of je meedoet. Als je niet wilt meedoen, dan hoeft dit niet, ook als je ouders dat liever wel willen. Als je wilt meedoen, zet je je handtekening op het formulier. Ook daarna **mag je altijd nog stoppen**, als je liever niet meer wilt. Vertel dat dan wel aan de onderzoeker. Je hoeft niet uit te leggen waarom je stopt.

Als je niet meedoet krijg je de standaardbehandeling. Dit is de behandeling met de heparine lock, die we normaal geven aan kinderen met een centrale lijn.

**Toestemming intrekken**

Als je wilt stoppen, vertel je dit aan de arts of de onderzoeksverpleegkundige. Dit heet: je toestemming intrekken. De informatie die al is verzameld gebruiken we nog voor het onderzoek.

**Jouw gegevens**

Voor het onderzoek hebben we twee dingen nodig die van jou zijn:

- **Persoonsgegevens** = informatie over wie jij bent, bijvoorbeeld je geboortedatum en waar je woont.
- **Medische gegevens** = (ook een soort persoonsgegevens) informatie over je gezondheid, bijvoorbeeld of je ziek bent en of je medicijnen gebruikt.

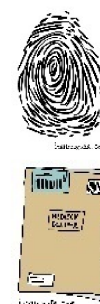

Deze **twee dingen zijn nodig bij het doen van het onderzoek**. Je ouders geven toestemming zodat wij deze dingen mogen gebruiken. Wil je meer weten over wat we precies doen met jouw gegevens? Vraag het dan aan je ouders, het staat in hun informatiebrief. Je kunt het ook aan de onderzoeker vragen. De gegevens krijgen **een code**, bijvoorbeeld letters en cijfers. Zo kan een ander niet zien dat de gegevens van jou zijn. Alleen de onderzoeker weet welke code bij wie hoort. Andere mensen zien alleen de code, zij weten dus niet jouw naam.

Informatie en toestemmingsformulier, kind 12-16 jaar, CATERPILLAR studie  
Prinses Máxima Centrum, versie 2.1, 08-03-2022

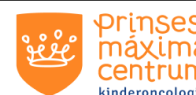

NL67388.041.20 / CATERPILLAR studie

### Verzekering

Er is een verzekering voor dit onderzoek, dat is verplicht. Wil je hier meer over weten? Dan kun je dat aan je ouders vragen. In de informatiebrief voor ouders staat het verder uitgelegd. Je kunt het ook aan de arts of onderzoeksverpleegkundige vragen.

## Jouw beslissing

### Het formulier

Wil je meedoen? Dan zet je een handtekening op het toestemmingsformulier. We hebben ook een handtekening van jouw ouders/voogd nodig. Wanneer iedereen voor deelname getekend heeft, ontvang je een kopie van dit document.

Ook kun je kiezen of we je later mogen vragen voor een vervolg onderzoek. We geven je dan informatie over het nieuwe onderzoek. Dan kun jij opnieuw beslissen of je wilt meedoen.

## Meer weten?

Wil je meer weten over onderzoek of over jouw rechten?

Kijk dan op de website van de VKN (Vereniging Kinderkanker Nederland) [www.kinderkankernederland.nl](http://www.kinderkankernederland.nl) of op [www.kindenonderzoek.nl](http://www.kindenonderzoek.nl).

### Bijlagen:

- Toestemmingsformulier

NL67388.041.20 / CATERPILLAR studie

## Toestemmingsformulier voor patiënten, 12-16 jaar

- Ik heb de informatie **begrepen**. Ook kon ik vragen stellen. Mijn **vragen** zijn beantwoord.
- Ik had **genoeg tijd om te beslissen** of ik meedoe.
- Ik weet dat ik **niet verplicht** ben om mee te doen.
- Ik begrijp dat ik **altijd mag stoppen** als ik niet meer mee wil doen.
- Ik geef\* ☐ **wel** ☐ **geen** toestemming om mij later te vragen voor een vervolgonderzoek.

### **Ik wil meedoen aan dit onderzoek.**

Naam kind: .....

Handtekening: .....

Datum : \_\_ / \_\_ / \_\_

### **Dit stuk is voor de onderzoeker:**

Ik verklaar dat ik het kind volledig heb geïnformeerd over het genoemde onderzoek.

Als er tijdens het onderzoek informatie bekend wordt die de toestemming van het kind zou kunnen beïnvloeden, dan breng ik het kind daarvan tijdig op de hoogte.

Naam arts/onderzoeker (of diens vertegenwoordiger): .....

Handtekening: .....

Datum: \_\_ / \_\_ / \_\_

-----

Aanvullende informatie is gegeven door (indien van toepassing):

Naam: .....

Functie: .....

Handtekening: .....

Datum: \_\_\_\_ / \_\_\_\_ / \_\_\_\_

-----

\* Doorhalen van niet van toepassing is.

*Het kind krijgt een volledige informatiebrief mee, samen met een (kopie van de) getekende versie van het toestemmingsformulier.*

Informatie en toestemmingsformulier, kind 12-16 jaar, CATERPILLAR studie  
Prinses Máxima Centrum, versie 2.1, 08-03-2022

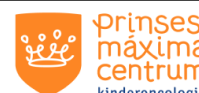

NL67388.041.20 / CATERPILLAR studie

## Informatiebrief voor deelname aan medisch wetenschappelijk onderzoek met toestemmingsformulier voor patiënten van 16 jaar en ouder

---

### CATERPILLAR-studie

*Officiële titel:* De effectiviteit van een lock oplossing met taurolidine, citraat, en heparine voor de preventie van getunnelde centrale lijn-geassocieerde bloedbaan infecties in kinderoncologie patiënten, een gerandomiseerde, mono-center trial.

Beste .....,

Wij vragen je om mee te doen aan een medisch-wetenschappelijk onderzoek. Meedoen is vrijwillig. Om mee te doen is wel je schriftelijke toestemming nodig.

Voordat je beslist of je mee wil doen aan dit onderzoek, krijg je uitleg over wat het onderzoek inhoudt. Lees deze informatie rustig door en vraag de arts of onderzoeker om uitleg als je vragen hebt. Je kunt ook de onafhankelijk arts, die aan het eind van deze brief genoemd wordt, om aanvullende informatie vragen. Je kan er ook over praten met je ouders, familie of vrienden.

Verdere informatie over meedoen aan zo'n onderzoek staat op de online pagina 'Medisch-wetenschappelijk onderzoek'. Deze pagina kun je vinden via [www.rijksoverheid.nl/mensenonderzoek](http://www.rijksoverheid.nl/mensenonderzoek). Er is ook een folder van de VKN (Vereniging Kinderkanker Nederland) over klinisch onderzoek. Deze folder zit in de dagboekagenda die je aan het begin van de behandeling krijgt.

Heb je na het lezen van de informatie nog vragen? Dan kun je terecht bij de behandelend arts of de researchverpleegkundige, wiens contactgegevens aan het eind van deze informatiebrief genoemd worden. Je beslist zelf of je meedoet of niet.

### 1. Algemene informatie

Dit onderzoek is opgezet door het Prinses Máxima Centrum voor Kinderoncologie en wordt alleen uitgevoerd in Nederland. De KWF Kankerbestrijding vergoedt de kosten van dit onderzoek. Voor dit onderzoek zijn in totaal 462 patiënten nodig. De medisch-ethische toetsingscommissie METC Utrecht heeft dit onderzoek goedgekeurd. Deze commissie heet vanaf 22-1-2022 de medisch-ethische toetsingscommissie NedMec. Algemene informatie over de toetsing van onderzoek vind je op de online pagina 'Medisch-wetenschappelijk onderzoek'.

### 2. Doel van het onderzoek

Het doel van dit onderzoek is uitzoeken hoe veilig en effectief het nieuwe medische hulpmiddel TauroLock-Hep100 is in het voorkomen van centrale lijn infecties de vorming van bloedstolsels in de centrale lijn en port-a-cath (PAC). In dit onderzoek vergelijken we de werking en veiligheid van TauroLock-Hep100 met de werking en veiligheid van de heparine lock. Een lock is een vloeistof waarmee een centrale lijn of PAC gevuld wordt nadat deze gebruikt is. Dit wordt afsluiten van de centrale lijn of PAC genoemd. Heparine wordt op dit moment in Nederland standaard gebruikt voor het afsluiten van de centrale lijn of PAC.

### 3. Achtergrond van het onderzoek

Voor de behandeling van je ziekte moet regelmatig chemotherapie worden toegediend en bloed worden afgenomen. Hiervoor wordt door de chirurg een zogenaamde 'centrale lijn' of 'PAC' geplaatst. Via deze lijn kan tijdens de behandeling eenvoudig en op een veilige manier chemotherapie worden toegediend en bloed worden afgenomen.

## NL67388.041.20 / CATERPILLAR studie

Bij minimaal 1 op de 4 patiënten die een centrale lijn of PAC krijgen ontstaat tijdens de behandeling een infectie door de centrale lijn of PAC. Gelukkig is zo'n infectie meestal goed te behandelen met het toedienen van antibiotica in het ziekenhuis. Soms moet de centrale lijn of PAC vanwege deze infectie echter vroegtijdig verwijderd worden door middel van een operatie.

Nadat de centrale lijn of PAC gebruikt is voor het toedienen van medicatie of het afnemen van bloed moet deze worden afgesloten. Dit doen we door de lijn te vullen met een vloeistof. De vloeistof waarmee we de centrale lijn of PAC afsluiten noemen we een 'lock' (zie **afbeelding 1**). Op dit moment wordt de vloeistof 'Heparine' standaard gebruikt als lock. Heparine is een middel dat de vorming van bloedstolsels in de centrale lijn of PAC voorkomt, maar het werkt helaas niet tegen infecties. Daarom zoeken we naar een vloeistof die ook helpt bij het voorkomen van infecties.

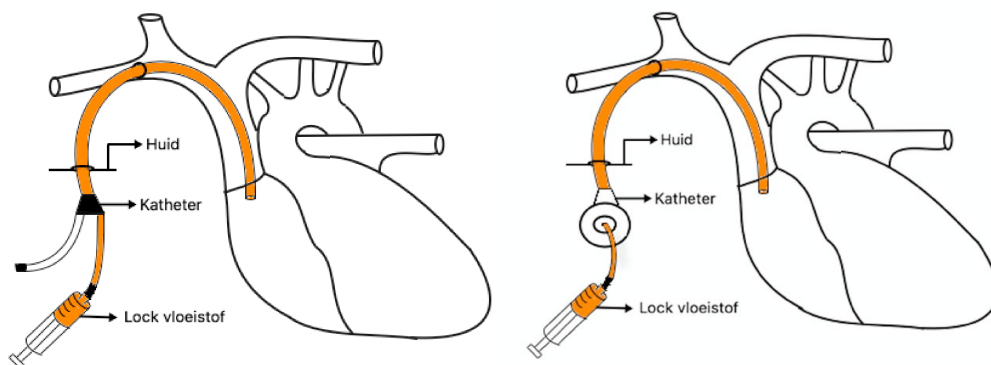

**Afbeelding 1:** Centraal veneuze lijn (links) en PAC (rechts) met lock vloeistof (bijv. Heparine of TauroLock-Hep100)

TauroLock-Hep100 is een andere, nieuwe vloeistof die gebruikt kan worden als lock. TauroLock-Hep 100 voorkomt mogelijk de vorming van bloedstolsels en voorkomt mogelijk ook infecties in de centrale lijn of PAC. Deze vloeistof is al onderzocht bij volwassenen met kanker en bij kinderen met andere aandoeningen én een centrale lijn of PAC. Ook is de TauroLock-Hep100 in kleinere onderzoeken gebruikt bij kinderen met kanker met een centrale lijn of PAC. In deze onderzoeken is TauroLock-Hep100 een veilige en effectieve lock gebleken. In dit onderzoek willen we de TauroLock-Hep100 vergelijken met heparine en aantonen dat deze lock beter is dan de heparine. De lock die in dit onderzoek het beste resultaat geeft, kan bij toekomstige patiënten gebruikt worden bij het afsluiten van de centrale lijn of PAC.

#### 4. Wat meedoen inhoudt

Als je meedoet aan het onderzoek, duurt dat in totaal maximaal 90 dagen. Na deze 90 dagen zal de centrale lijn of PAC afgesloten worden met de standaard heparine vloeistof.

#### Geschiktheidsonderzoek

Eerst bepalen we of je kunt meedoen aan het onderzoek. De arts zal hiervoor vragen naar je medische geschiedenis.

#### Onderzoek

De kinderen en jongeren die meedoen aan dit onderzoek, worden verdeeld in twee gelijke groepen. De helft van de groep krijgt gedurende 90 dagen de standaard heparine lock, de andere groep krijgt de TauroLock-Hep100 lock. Een loting (randomisatie) bepaalt welke lock jij krijgt. De behandelend arts en onderzoekers hebben geen invloed op de uitslag van de loting. Algemene informatie over randomisatie vind je op de online pagina 'Medisch-wetenschappelijk onderzoek'.

## NL67388.041.20 / CATERPILLAR studie

Tijdens de onderzoeksperiode wordt de studie lock maximaal 1x per week en minimaal 1x per 3 weken ingebracht in je centrale lijn of PAC. Dat gebeurt in het Prinses Máxima Centrum. Het inbrengen van de lock wordt zoveel als mogelijk gecombineerd met opnames en afspraken die al gepland worden voor je behandeling. De lock blijft in het slangetje van je centrale lijn of PAC aanwezig totdat de centrale lijn of PAC weer gebruikt wordt. Als de centrale lijn of PAC opnieuw gebruikt wordt, zal de vloeistof eerst uit de lijn opgetrokken worden. De vloeistof wordt dus zo min mogelijk je lichaam ingespoten. Hoe vaak de lock wordt ingebracht is afhankelijk van hoe vaak je centrale lijn of PAC wordt gebruikt en wanneer je in het Prinses Máxima Centrum bent.

Als de centrale lijn of PAC tussendoor elders of ongepland wordt gebruikt, bijvoorbeeld tijdens een bezoek aan een ander ziekenhuis in Nederland, zal de lock worden opgetrokken zoals hierboven beschreven en zal de lijn of PAC worden afgesloten met een in Nederland gebruikelijke standaard heparine lock. Als de onderzoeksperiode van 90 dagen is afgelopen zal de centrale lijn of PAC van alle patiënten verzorgd worden met de standaard heparine lock.

**Bezoeken en metingen**

Er wordt gedurende 90 dagen tenminste 1x per 3 weken en maximaal 1x per week een nieuwe lock ingebracht in het Prinses Máxima Centrum. De lock wordt ingebracht tijdens je al geplande afspraken en opnames. Dit zal jou maximaal 70 minuten in totaal kosten. Het inbrengen van een TauroLock-Hep100 lock verloopt hetzelfde als het inbrengen van een heparine lock.

Het inbrengen van een lock duurt ongeveer 5 minuten. Na het inbrengen van de lock zullen we je een aantal korte vragen stellen over het wel of niet ervaren van bijwerkingen. Dit kunnen de bijwerkingen zijn:

- een kortdurende vreemde smaak,
- tintelingen in de mond
- een drukkend gevoel in nek of borst
- of misselijk gevoel.

We willen graag de bijwerkingen van beide locks goed registreren.

**Wat is er meer of anders dan de gebruikelijke zorg?**

Als je meedoet aan het onderzoek, dan krijg je gedurende 90 dagen mogelijk een TauroLockHep-100 lock in plaats van de gebruikelijke heparine lock.

Bij aanvang van de studie ontvang je een CATERPILLAR-deelnemerskaart en Ja/Nee-stickers (zie **afbeelding 2**). We vragen jou en je ouders om de deelnemerskaart bij jullie te houden en te laten zien bij elk ziekenhuisbezoek in het Prinses Máxima Centrum of een ander ziekenhuis. Zo wordt overal herkend dat je meedoet aan dit onderzoek.

Het inbrengen van de lock zal altijd gecombineerd worden met al geplande afspraken en opnames.

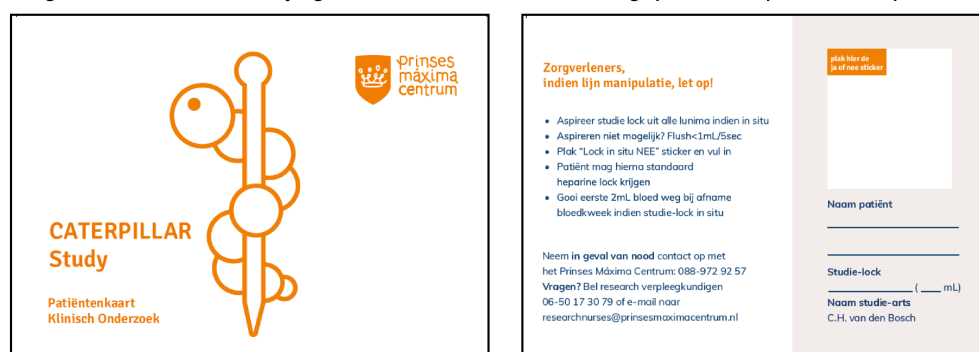

**Afbeelding 2:** CATERPILLAR Ja/Nee-stickers en deelnemerskaart.

Informatie en toestemmingsformulier, patiënt 16 jaar en ouder, CATERPILLAR studie Prinses Máxima Centrum, versie 2.1, 08-03-2022

NL67388.041.20 / CATERPILLAR studie

## 5. Wat wordt er van je verwacht

Om het onderzoek goed te laten verlopen, en voor je eigen veiligheid, is het belangrijk dat je je aan de volgende afspraken houdt.

De afspraken zijn dat jij en/of je ouders:

- De deelnemerskaart en Ja/Nee-stickers bij je draagt en laat zien bij elk ziekenhuisbezoek. Hierop staat dat je meedoet aan dit onderzoek. Er staat ook op wie je in geval van nood moet waarschuwen.
- De afspraken voor het inbrengen van de lock nakomt.
- Vragen beantwoord over het ontstaan van eventuele symptomen na het inbrengen van de lock.

Het is belangrijk dat jij of je ouders contact opneemt met de onderzoeker of research verpleegkundige:

- Als je in een ziekenhuis wordt opgenomen of behandeld.
- Als je plotseling gezondheidsklachten krijgt.
- Als je niet meer wilt meedoen aan het onderzoek.
- Als je contactgegevens wijzigen.

## Anticonceptie en zwangerschap

Ben je als vrouw in de vruchtbare leeftijd? Dan moet je voorkomen dat je tijdens het onderzoek zwanger wordt en mag je niet deelnemen indien je borstvoeding geeft. De behandelend arts zal met jou de meest geschikte voorbehoedmiddelen bespreken. Word je toch zwanger in de onderzoeksperiode? Neem direct contact op met je behandelend arts. Het kan zijn dat dit onderzoek gevolgen heeft voor het ongeboren kind.

Ben je als man in de leeftijd waarop de mogelijkheid bestaat om een kind te verwekken? Dan moet je voorbehoedmiddelen gebruiken om een zwangerschap te voorkomen. Men weet namelijk niet zeker of de behandeling nadelige invloed heeft op het sperma. Wordt je partner toch zwanger in de onderzoeksperiode? Neem direct contact op met de behandelend arts. Het kan zijn dat dit onderzoek gevolgen heeft voor het ongeboren kind.

## 6. Mogelijke bijwerkingen, complicaties en eventuele nadelige effecten

TauroLock-Hep100 kan mogelijk lichte ongemakken geven. Deze ongemakken komen niet vaak voor en zijn niet ernstig gebleken. Je kan de volgende lichte ongemakken ervaren direct na het inbrengen van de TauroLock-Hep100:

- Kortdurende veranderde smaak
- Kortdurende tintelingen in de mond
- Kortdurend drukkend gevoel in de nek of borst
- Kortdurende misselijkheid of overgeven
- Allergische reacties op het middel

TauroLock-Hep100 kan ook nadelige effecten hebben die nog onbekend zijn.

De standaard heparine lock wordt al heel veel gebruikt. Hiervan zijn geen bijwerkingen bekend.

## 7. Mogelijke voor- en nadelen

Het is belangrijk dat je de mogelijke voor- en nadelen goed afweegt voordat je besluit om mee te doen aan het onderzoek.

Voordelen:

- Als je meedoet aan dit onderzoek en na de loting de TauroLock-Hep 100 lock krijgt, dan kan de TauroLock-Hep100 centrale lijn infecties mogelijk voorkomen. Dit is nog niet aangetoond en de reden dat we dit onderzoek uitvoeren.

## NL67388.041.20 / CATERPILLAR studie

- Jouw deelname aan dit onderzoek draagt bij aan meer kennis over het mogelijk voorkomen van centrale lijn infecties en kan de behandeling van toekomstige patiënten verbeteren.

## Nadelen:

- Als je na de loting de TauroLock-Hep100 lock krijgt, dan kan je de al genoemde bijwerkingen ervaren bij het inbrengen van de locks.

**8. Als je niet wilt meedoen of als je wilt stoppen met het onderzoek**

Je beslist zelf of je meedoet aan het onderzoek. Deelname is vrijwillig. Als je niet wilt meedoen, dan word je op de gebruikelijke manier behandeld. De standaard behandeling is de heparine lock.

Als je meedoet, kun je je altijd bedenken en alsnog stoppen, ook tijdens het onderzoek. De centrale lijn of PAC zal vanaf dat moment afgesloten worden met de standaard heparine lock. Je hoeft niet te zeggen waarom je stopt. Wel moet je dit direct melden aan de behandelend arts. De gegevens die tot dat moment zijn verzameld, worden gebruikt voor het onderzoek.

Als er nieuwe informatie over het onderzoek is die belangrijk voor je is, laat de arts dit aan je weten. Je wordt dan gevraagd of je mee blijft doen.

**9. Einde van het onderzoek**

Je deelname aan het onderzoek stopt als:

- De onderzoeksperiode van 90 dagen voorbij is.
- Je een infectie aan de centrale lijn of PAC krijgt.
- De centrale lijn of PAC om een medische reden wordt verwijderd.
- Je een extra centrale lijn krijgt.
- Je een allergische reactie krijgt op het middel.
- Je zelf kiest om te stoppen.
- De onderzoeker het beter voor je vindt om te stoppen.
- Het Prinses Máxima Centrum, de overheid of de beoordelende medisch-ethische toetsingscommissie, besluit om het onderzoek te stoppen.

Het hele onderzoek is afgelopen als alle deelnemers klaar zijn. Na het verwerken van alle gegevens kan de onderzoeker je als je dat wilt informeren over de belangrijkste uitkomsten van het onderzoek. Dit gebeurt ongeveer een half jaar na het einde van het gehele onderzoek.

**10. Gebruik en bewaren van de gegevens**

Voor dit onderzoek worden je persoonsgegevens verzameld, gebruikt en bewaard. Het gaat om gegevens zoals naam, adres, geboortedatum en om gegevens over je gezondheid. Het verzamelen, gebruiken en bewaren van je gegevens is nodig om de vragen die in dit onderzoek worden gesteld te kunnen beantwoorden en de resultaten te kunnen publiceren. Wij vragen voor het gebruik van je gegevens toestemming. Als je dat niet wilt, kun je niet deelnemen aan dit onderzoek.

**Vertrouwelijkheid van de gegevens**

Om je privacy te beschermen, worden je gegevens voorzien van een code. De naam en andere gegevens die jou direct kunnen identificeren worden apart bewaard. Alleen met de sleutel van de code zijn gegevens tot jou te herleiden. De sleutel van de code blijft veilig opgeborgen in de lokale onderzoeksinstelling. Ook in rapporten en publicaties over het onderzoek zijn de gegevens niet tot jou te herleiden.

NL67388.041.20 / CATERPILLAR studie

### **Toegang tot je gegevens voor controle**

Sommige personen en instanties kunnen op de onderzoekslocatie toegang krijgen tot al jouw gegevens. Ook in de gegevens zonder code. Dit is nodig om te kunnen controleren of het onderzoek goed en betrouwbaar is uitgevoerd. Personen en instanties die ter controle toegang krijgen tot je gegevens zijn de:

- Veiligheidscommissie die het onderzoek in de gaten houdt.
- Een monitor die door de opdrachtgever is ingehuurd.
- Nationale en internationale toezichthoudende autoriteiten, bijv. de Inspectie Gezondheidszorg en Jeugd.
- De medewerkers van het onderzoeksteam.

Zij zullen jouw gegevens geheim houden. Je wordt gevraagd voor deze inzage toestemming te geven.

### **Bewaartermijn gegevens**

Je gegevens moeten 15 jaar worden bewaard op de onderzoekslocatie (het ziekenhuis).

### **Bewaren en gebruik van gegevens voor ander onderzoek**

Je gegevens kunnen na afloop van dit onderzoek ook nog van belang zijn voor ander wetenschappelijk onderzoek op het gebied van jou aandoening en/of van de verdere ontwikkeling van het product/ de behandelmethode. Daarvoor zullen je gegevens minimaal 15 jaar worden bewaard. Je kunt op het toestemmingsformulier aangeven of je hier wel of niet mee instemt. Als je hier niet mee instemt, kan je gewoon deelnemen aan het huidige onderzoek.

### **Intrekken toestemming**

Je kunt de toestemming voor gebruik van je persoonsgegevens altijd weer intrekken. Dit geldt voor dit onderzoek en ook voor het bewaren en het gebruik van je gegevens voor toekomstig onderzoek. De onderzoeksgegevens over jou die zijn verzameld tot het moment dat je je toestemming intrekt worden nog wel gebruikt in het onderzoek.

### **Meer informatie over de rechten bij verwerking van gegevens**

Voor algemene informatie over je rechten bij verwerking van je persoonsgegevens kun je de website van de Autoriteit Persoonsgegevens raadplegen op: <https://autoriteitpersoonsgegevens.nl/nl>

Bij vragen of klachten over de verwerking van je persoonsgegevens kun je contact opnemen met de Functionaris voor de Gegevensbescherming van het Prinses Máxima Centrum: [fg@prinsesmaximacentrum.nl](mailto:fg@prinsesmaximacentrum.nl)

### **Registratie van het onderzoek**

Informatie over dit onderzoek is ook opgenomen in een overzicht van medisch-wetenschappelijke onderzoeken namelijk <https://www.trialregister.nl>. Daarin zijn geen gegevens opgenomen die naar jou herleidbaar zijn. Na het onderzoek kan de website een samenvatting van de resultaten van dit onderzoek tonen. Je vindt dit onderzoek onder 'CATERPILLAR'.

### **11. Verzekering**

Voor iedereen die meedoet aan dit onderzoek is een verzekering afgesloten. De verzekering dekt schade door het onderzoek. Niet alle schade is gedekt. In **bijlage A** vind je meer informatie over de verzekering en de uitzonderingen. Daar staat ook aan wie je schade kunt melden.

### **12. Informeren van de huisarts en/of behandelend specialist**

Wij informeren je huisarts en andere betrokken medisch specialisten over jouw deelname aan het onderzoek. Dit is voor je eigen veiligheid. Als je dit niet goed vindt, kan je niet meedoen aan dit onderzoek.

NL67388.041.20 / CATERPILLAR studie

### 13. Vergoeding voor meedoen

Deelname aan het onderzoek en de locks kosten je niets extra. Je krijgt geen vergoeding voor je deelname aan dit onderzoek.

### 14. Heb je vragen?

Als je tijdens het onderzoek of de behandeling vragen of klachten hebt, kun je altijd terecht bij je behandelend arts. Bij vragen of opmerkingen kun je ook contact opnemen met:

- Drs. Ceder van den Bosch, arts-onderzoeker, bereikbaar via het telefoonnummer: 0650006564. Of stuur een e-mail naar: [C.H.vandenBosch-4@prinsesmaximacentrum.nl](mailto:C.H.vandenBosch-4@prinsesmaximacentrum.nl)
- De researchverpleegkundigen, bereikbaar via het telefoonnummer: 0650173079. Of stuur een e-mail naar: [researchnurses@prinsesmaximacentrum.nl](mailto:researchnurses@prinsesmaximacentrum.nl)

Als je twijfelt over deelname aan het onderzoek, dan kun je een onafhankelijke arts raadplegen die zelf niet bij het onderzoek is betrokken maar wel deskundig is op dit gebied.

- Dr. Bierings is bereikbaar via het telefoonnummer: 088 9725249

Ook als je voor of tijdens het onderzoek vragen hebt die je liever niet aan de onderzoekers stelt dan kun je contact opnemen met de onafhankelijke arts.

Als je een klacht wil indienen, dan kun je hiervoor contact opnemen met de ombudsvrouw van het Prinses Máxima Centrum. Zij probeert samen met jou en de betrokkenen tot een oplossing te komen. De ombudsvrouw is dagelijks bereikbaar op het telefoonnummer 0650006416 of via de mail: [ombudsvrouw@prinsesmaximacentrum.nl](mailto:ombudsvrouw@prinsesmaximacentrum.nl).

### 15. Ondertekening toestemmingsformulier

Wanneer je voldoende bedenktijd hebt gehad, word je gevraagd te beslissen over deelname aan dit onderzoek. Als je toestemming geeft, zullen wij je vragen deze op de bijbehorende toestemmingsverklaring schriftelijk te bevestigen. Door jou schriftelijke toestemming geef je aan dat je de informatie hebt begrepen en instemt met deelname aan het onderzoek. Het getekende formulier wordt bewaard door de behandelend arts. Je ontvangt een kopie van de getekende toestemmingsverklaring.

Met vriendelijke groet,  
Prof. Dr. Marc Wijnen, kinderoncologisch chirurg  
Drs. Ceder van den Bosch, arts-onderzoeker

### Bijlagen:

Bijlage A: Informatie over verzekering

- Online pagina Medisch-wetenschappelijk onderzoek: <https://www.rijksoverheid.nl/mensenonderzoek>
- Toestemmingsformulier

NL67388.041.20 / CATERPILLAR studie

**Bijlage A: Informatie over de verzekering**

Voor iedereen die meedoet aan dit onderzoek heeft het Prinses Máxima Centrum voor Kinderoncologie een verzekering afgesloten. De verzekering dekt schade door deelname aan het onderzoek. Dit geldt voor schade tijdens het onderzoek of binnen vier jaar na het einde van jou deelname aan het onderzoek. Schade moet u binnen die vier jaar aan de verzekeraar hebben gemeld.

De verzekering dekt niet alle schade. Onderaan deze tekst staat in het kort welke schade niet wordt gedekt. Deze bepalingen staan in het Besluit verplichte verzekering bij medisch-wetenschappelijk onderzoek met mensen. Dit besluit staat op [www.ccmo.nl](http://www.ccmo.nl), de website van de Centrale Commissie Mensgebonden Onderzoek (zie 'Bibliotheek' en dan 'Wet- en regelgeving').

Bij schade kun je direct contact leggen met de verzekeraar of schaderegelaar.

De verzekeraar van het onderzoek is:

Naam: CNA Insurance Company Limited.  
Adres: Polarisavenue 140, 2132 JX Hoofddorp  
(Polisnummer: 10211864)

De schaderegelaar van het onderzoek is:

Naam: Esther van Herk  
Adres: Polarisavenue 140, 2132 JX Hoofddorp  
E-mail: [esther.vanherk@cnahardy.com](mailto:esther.vanherk@cnahardy.com)  
Telefoonnummer: +31 (0)23 3036004

De verzekering biedt een maximum dekking van € 650.000 per proefpersoon en € 5.000.000 voor het hele onderzoek en € 7.500.000 per jaar voor alle onderzoeken van dezelfde opdrachtgever.

De verzekering dekt de volgende schade **niet**:

- Schade door een risico waarover je in de schriftelijke informatie bent ingelicht. Dit geldt niet als het risico zich ernstiger voordoet dan was voorzien of als het risico heel onwaarschijnlijk was;
- Schade aan jouw gezondheid die ook zou zijn ontstaan als je niet aan het onderzoek had meegedaan;
- Schade door het niet (volledig) opvolgen van aanwijzingen of instructies;
- Schade aan je nakomelingen, als gevolg van een negatief effect van het onderzoek op jou of jouw nakomelingen;
- Schade door een bestaande behandelmethode bij onderzoek naar bestaande behandelmethoden.

NL67388.041.20 / CATERPILLAR studie

**Toestemmingsformulier voor patiënten, 16 jaar en ouder**

**Officiële titel:** De effectiviteit van een lock oplossing met taurolidine, citraat, en heparine voor de preventie van getunnelde centrale lijn-geassocieerde bloedbaan infecties in kinderoncologie patiënten, een gerandomiseerde, mono-center trial.

Ik ben gevraagd om toestemming te geven, voor deelname aan dit medisch-wetenschappelijke onderzoek:

- Ik heb de informatiebrief gelezen. Ik kon aanvullende vragen stellen. Mijn vragen zijn genoeg beantwoord. Ik had genoeg tijd om te beslissen of ik wil meedoen.
- Ik weet dat meedoen vrijwillig is. Ook weet ik dat ik op ieder moment kan beslissen om toch niet mee te doen. Daarvoor hoef ik geen reden te geven.
- Ik geef toestemming voor het informeren van mijn huisarts en behandelend specialist dat ik mee doe aan dit onderzoek.
- Ik geef toestemming voor het opvragen van informatie bij mijn huisarts en specialist over de centrale lijn of PAC en eventuele centrale lijn complicaties.
- Ik weet dat voor de controle van het onderzoek sommige mensen toegang tot mijn gegevens kunnen krijgen. Die mensen staan vermeld in deze informatiebrief. Ik geef toestemming voor die inzage door deze personen.
- Ik geef toestemming voor het verzamelen en gebruiken van mijn gegevens voor de beantwoording van de onderzoeksvraag in dit onderzoek.
- Ik weet dat ik niet zwanger mag worden/mijn partner niet zwanger mag maken tijdens het onderzoek. De onderzoeker heeft de meest geschikte anticonceptie voor mij en/of mijn partner met mij besproken.
- Ik geef ☐ wel ☐ geen \* toestemming om mijn persoonsgegevens langer te bewaren en te gebruiken voor toekomstig onderzoek op het gebied van centrale lijn infecties.
- Ik geef ☐ wel ☐ geen \* toestemming om mij na dit onderzoek opnieuw te benaderen voor een vervolgonderzoek.
- Ik geef toestemming voor de randomisatie (loting) in dit onderzoek.
- Na het ondertekenen van dit toestemmingsformulier zal ik een kopie van de ondertekenpagina ontvangen.

Ik ga ermee akkoord dat ik mee doe aan dit onderzoek.

Naam proefpersoon: .....

Handtekening: .....

Datum: \_\_\_\_/\_\_\_\_/\_\_\_\_

\* Doorhalen van niet van toepassing is.

De proefpersoon krijgt een volledige informatiebrief mee, samen met een getekende versie van het toestemmingsformulier.

NL67388.041.20 / CATERPILLAR studie

**Toestemmingsformulier voor patiënten, 16 jaar en ouder**

**Officiële titel:** De effectiviteit van een lock oplossing met taurolidine, citraat, en heparine voor de preventie van getunnelde centrale lijn-geassocieerde bloedbaan infecties in kinderoncologie patiënten, een gerandomiseerde, mono-center trial.

Ik verklaar hierbij dat ik bovengenoemde persoon volledig heb geïnformeerd over het genoemde onderzoek. Als er tijdens het onderzoek informatie bekend wordt die de toestemming van de proefpersoon zou kunnen beïnvloeden, dan breng ik hem/haar daarvan tijdig op de hoogte.

Naam arts: .....

Handtekening: .....

Datum: \_\_\_\_/\_\_\_\_/\_\_\_\_

-----  
Aanvullende informatie is gegeven door (indien van toepassing):

Naam: .....

Functie: .....

Handtekening: .....

Datum: \_\_\_\_/\_\_\_\_/\_\_\_\_  
-----
